# Supplementary material for: Prenatal and infant exposure to ambient pesticides and autism spectrum disorder in children: population based case-control study
Source: PubMed Central journal article supplement — BMJ. 2019 Mar 20;364:l962. doi: 10.1136/bmj.l962 (PMC6425996; doi:10.1136/bmj.l962), 2019-03-20
Supplement: vono045905.ww.pdf [file vono045905.ww.pdf]

## Online material index

eMethods: California Pesticide Use Registry (PUR) data: additional information on mandatory reported substances

eTable 1: Classification by application

eTable 2a: Correlation matrix for the pregnancy period continuous exposures (lbs/acre, spearman coefficients)

eTable 2b: Correlation matrix for the pregnancy period binary exposures (ever/never , tetrachoric coefficients)

eTable 2c: Correlations between exposures in developmental periods (lbs/acre, spearman coefficients)

eTable 2d: Correlations between exposures in developmental periods (ever/never, tetrachoric coefficients)

eTable 3: Odds ratios (95% CIs) for all ASD and ASD with ID comorbidity in relation to 3-month pre-pregnancy exposure

eTable 4: Exposure (ever vs never) in different developmental periods among controls

eTable 5. Odds ratios (95% CIs) for ASD without ID comorbidity and exposure to pesticides for pregnancy and first year of life exposures in logistic regression

eTable 6a. Odds ratios (95% CIs) for all ASD and exposure to pesticides for pregnancy and first year of life exposures in in 2,500m radius

eTable 6b. Odds ratios (95% CIs) for ASD with ID comorbidity and exposure to pesticides for pregnancy and first year of life exposures in 2,500m radius

eTable 7. Odds ratios (95% CIs) for ASD (all) and exposure to pesticides for pregnancy and first year of life exposures in logistic regression models stratified by males/females

## Online Material: Methods

- (1) California Pesticide Use Registry (PUR) data: additional information on mandatory reported substances

California's pesticide use reporting program is recognized as the most comprehensive in the world. In 1990, California became the first state to require full reporting of agricultural pesticide use in response to demands for more realistic and comprehensive pesticide use data. Under the program, all agricultural pesticide use must be reported monthly. According to the California Department of Pesticide Registration the California -PUR reporting requirements include pesticide applications to parks, golf courses, cemeteries, rangeland, pastures, and along roadside and railroad rights-of-way. In addition, all postharvest pesticide treatments of agricultural commodities must be reported along with all pesticide treatments in poultry and fish production as well as some livestock applications. The primary exceptions to the reporting requirements are home-and-garden use and most industrial and institutional uses. Regulation California Department of Pesticide Use Reports. Online <http://www.cdpr.ca.gov/docs/pur/purmain.htm> accessed 5/01/2018.

eTable 1. Classification by application

| Substance      | Application                       |
|----------------|-----------------------------------|
| Glyphosate     | Broad spectrum systemic herbicide |
| Chlorpyrifos   | Insecticide                       |
| Diazinon       | Insecticide; acaricide            |
| Acephate       | Insecticide; foliar               |
| Malathion      | Insecticide                       |
| Permethrin     | Insecticide                       |
| Bifenthrin     | Insecticide                       |
| Methyl bromide | Fumigant; insecticide             |
| Imidacloprid   | Insecticide                       |
| Avermectin     | Anthelmintic; insecticide         |
| Myclobutanil   | Fungicide                         |

eTable 2a. Correlation matrix for the pregnancy period continuous exposures (lbs/acre, spearman coefficients)

|                   | Glypho-<br>sates | Chlorpy-<br>rifos | Diazinon | Acephate | Mala-<br>thion | Perme-<br>thrin | Bifen-<br>thrin | Methyl<br>bromide | Imida-<br>clorpid | Aver-<br>mectin | Myclo-<br>butanil |
|-------------------|------------------|-------------------|----------|----------|----------------|-----------------|-----------------|-------------------|-------------------|-----------------|-------------------|
| Glyphosates       | 1.00             | 0.58              | 0.29     | 0.13     | 0.25           | 0.33            | 0.16            | 0.22              | 0.38              | 0.44            | 0.44              |
| Chlorpyrifos      | 0.58             | 1.00              | 0.23     | 0.19     | 0.27           | 0.28            | 0.21            | 0.19              | 0.32              | 0.44            | 0.36              |
| Diazinon          | 0.29             | 0.23              | 1.00     | 0.08     | 0.09           | 0.14            | 0.00            | 0.23              | 0.16              | 0.06            | 0.32              |
| Acephate          | 0.13             | 0.19              | 0.08     | 1.00     | 0.13           | 0.14            | 0.18            | 0.07              | 0.20              | 0.23            | 0.13              |
| Malathion         | 0.25             | 0.27              | 0.09     | 0.13     | 1.00           | 0.18            | 0.08            | 0.08              | 0.19              | 0.24            | 0.15              |
| Permethrin        | 0.33             | 0.28              | 0.14     | 0.14     | 0.18           | 1.00            | 0.16            | 0.16              | 0.20              | 0.32            | 0.26              |
| Bifenthrin        | 0.16             | 0.21              | 0.00     | 0.18     | 0.08           | 0.16            | 1.00            | 0.01              | 0.21              | 0.35            | 0.13              |
| Methyl<br>bromide | 0.22             | 0.19              | 0.23     | 0.07     | 0.08           | 0.16            | 0.01            | 1.00              | 0.10              | 0.06            | 0.13              |
| Imidacloprid      | 0.38             | 0.32              | 0.16     | 0.20     | 0.19           | 0.20            | 0.21            | 0.10              | 1.00              | 0.46            | 0.42              |
| Avermectin        | 0.44             | 0.44              | 0.06     | 0.23     | 0.24           | 0.32            | 0.35            | 0.06              | 0.46              | 1.00            | 0.34              |
| Myclobutanil      | 0.44             | 0.36              | 0.32     | 0.13     | 0.15           | 0.26            | 0.13            | 0.13              | 0.42              | 0.34            | 1.00              |

eTable 2b. Correlation matrix for the pregnancy period binary exposures (ever/never, tetrachoric coefficients)

|                   | Glypho-<br>sates | Chlorpy-<br>rifos | Diazinon | Acephate | Mala-<br>thion | Perme-<br>thrin | Bifen-<br>thrin | Methyl<br>bromide | Imida-<br>clorpid | Aver-<br>mectin | Myclo-<br>butanil |
|-------------------|------------------|-------------------|----------|----------|----------------|-----------------|-----------------|-------------------|-------------------|-----------------|-------------------|
| Glyphosates       | 1.00             | 0.87              | 0.71     | 0.48     | 0.65           | 0.73            | 0.51            | 0.68              | 0.79              | 0.80            | 0.82              |
| Chlorpyrifos      | 0.87             | 1.00              | 0.59     | 0.45     | 0.60           | 0.60            | 0.48            | 0.58              | 0.62              | 0.73            | 0.64              |
| Diazinon          | 0.71             | 0.59              | 1.00     | 0.24     | 0.36           | 0.38            | 0.11            | 0.58              | 0.46              | 0.36            | 0.63              |
| Acephate          | 0.48             | 0.45              | 0.24     | 1.00     | 0.33           | 0.33            | 0.33            | 0.20              | 0.35              | 0.46            | 0.30              |
| Malathion         | 0.65             | 0.60              | 0.36     | 0.33     | 1.00           | 0.39            | 0.21            | 0.35              | 0.35              | 0.47            | 0.36              |
| Permethrin        | 0.73             | 0.60              | 0.38     | 0.33     | 0.39           | 1.00            | 0.41            | 0.39              | 0.39              | 0.58            | 0.48              |
| Bifenthrin        | 0.51             | 0.48              | 0.11     | 0.33     | 0.21           | 0.41            | 1.00            | 0.11              | 0.32              | 0.57            | 0.27              |
| Methyl<br>bromide | 0.68             | 0.58              | 0.58     | 0.20     | 0.35           | 0.39            | 0.11            | 1.00              | 0.33              | 0.37            | 0.49              |
| Imidacloprid      | 0.79             | 0.62              | 0.46     | 0.35     | 0.35           | 0.39            | 0.32            | 0.33              | 1.00              | 0.64            | 0.68              |
| Avermectin        | 0.80             | 0.73              | 0.36     | 0.46     | 0.47           | 0.58            | 0.57            | 0.37              | 0.64              | 1.00            | 0.53              |
| Myclobutanil      | 0.82             | 0.64              | 0.63     | 0.30     | 0.36           | 0.48            | 0.27            | 0.49              | 0.68              | 0.53            | 1.00              |

eTable 2c. Correlations between exposures in developmental periods (lbs/acre, spearman coefficients)

| Chemical       | Pregnancy vs pre-pregnancy | Pregnancy vs first year of life |
|----------------|----------------------------|---------------------------------|
| Glyphosates    | 0.76                       | 0.87                            |
| Chlorpyrifos   | 0.55                       | 0.82                            |
| Diazinon       | 0.46                       | 0.65                            |
| Acephate       | 0.37                       | 0.51                            |
| Malathion      | 0.30                       | 0.49                            |
| Permethrin     | 0.48                       | 0.68                            |
| Bifenthrin     | 0.31                       | 0.55                            |
| Methyl bromide | 0.43                       | 0.58                            |
| Imidacloprid   | 0.44                       | 0.71                            |
| Avermectin     | 0.31                       | 0.77                            |
| Myclobutanil   | 0.42                       | 0.73                            |

eTable 2d. Correlations between exposures in developmental periods (ever/never, tetrachoric correlation)

| Chemical       | Pregnancy vs pre-pregnancy | Pregnancy vs first year of life |
|----------------|----------------------------|---------------------------------|
| Glyphosates    | 0.91                       | 0.95                            |
| Chlorpyrifos   | 0.78                       | 0.91                            |
| Diazinon       | 0.72                       | 0.84                            |
| Acephate       | 0.70                       | 0.78                            |
| Malathion      | 0.56                       | 0.72                            |
| Permethrin     | 0.73                       | 0.84                            |
| Bifenthrin     | 0.59                       | 0.77                            |
| Methyl bromide | 0.69                       | 0.79                            |
| Imidacloprid   | 0.67                       | 0.84                            |
| Avermectin     | 0.58                       | 0.88                            |
| Myclobutanil   | 0.66                       | 0.85                            |

eTable 3. Odds ratios (95% CIs) for all ASD and ASD with ID comorbidity in relation to 3-month pre-pregnancy exposure

|                | All ASD         |              |                 |              | ASD with ID     |              |                 |              |
|----------------|-----------------|--------------|-----------------|--------------|-----------------|--------------|-----------------|--------------|
|                | OR <sup>1</sup> | 95% CI       | OR <sup>2</sup> | 95% CI       | OR <sup>1</sup> | 95% CI       | OR <sup>2</sup> | 95% CI       |
| Glyphosates    | 1.08            | (1.00, 1.17) | 1.07            | (0.98, 1.18) | 1.22            | (0.99, 1.49) | 1.19            | (0.94, 1.52) |
| Chlorpyrifos   | 1.01            | (0.94, 1.10) | 0.94            | (0.86, 1.04) | 0.99            | (0.82, 1.21) | 0.81            | (0.64, 1.03) |
| Diazinon       | 0.98            | (0.88, 1.09) | 0.95            | (0.84, 1.07) | 1.13            | (0.88, 1.45) | 1.01            | (0.77, 1.33) |
| Acephate       | 1.12            | (0.95, 1.31) | 1.07            | (0.91, 1.27) | 1.54            | (1.11, 2.13) | 1.47            | (1.04, 2.09) |
| Malathion      | 1.01            | (0.89, 1.15) | 0.97            | (0.84, 1.11) | 0.83            | (0.59, 1.17) | 0.73            | (0.51, 1.05) |
| Permethrin     | 1.12            | (1.02, 1.24) | 1.10            | (0.98, 1.22) | 1.37            | (1.09, 1.71) | 1.30            | (1.01, 1.67) |
| Bifenthrin     | 1.14            | (1.01, 1.28) | 1.10            | (0.97, 1.26) | 1.33            | (0.99, 1.79) | 1.27            | (0.91, 1.76) |
| Methyl bromide | 1.16            | (1.04, 1.30) | 1.15            | (1.02, 1.29) | 1.18            | (0.91, 1.53) | 1.09            | (0.83, 1.45) |
| Imidacloprid   | 1.03            | (0.94, 1.13) | 0.99            | (0.89, 1.10) | 1.01            | (0.80, 1.27) | 0.84            | (0.64, 1.09) |
| Avermectin     | 1.08            | (0.99, 1.18) | 1.04            | (0.93, 1.16) | 1.13            | (0.90, 1.40) | 1.03            | (0.78, 1.36) |
| Myclobutanil   | 0.99            | (0.90, 1.08) | 0.94            | (0.85, 1.05) | 1.23            | (0.99, 1.52) | 1.17            | (0.91, 1.51) |

<sup>1</sup> Logistic regression; adjusted for year of birth, sex, maternal race/ethnicity, maternal age, maternal education, NOx (CALINE4); pesticide exposure defined as “ever vs. never” to specific substance in considered developmental period.

<sup>2</sup> Logistic regression; adjusted for all in model #1; pesticide exposure defined as “ever vs. never” to specific substance in considered developmental period with all considered pesticides in the model.

eTable 4. Exposure (ever vs never) in different developmental periods, among controls in percent

|                | Pre-pregnancy only | Pregnancy only | First year of life only | Pre-pregnancy and pregnancy only | Pre-pregnancy and the first year of life only | Pregnancy and the first year of life only | All three periods |
|----------------|--------------------|----------------|-------------------------|----------------------------------|-----------------------------------------------|-------------------------------------------|-------------------|
| Glyphosates    | 0.5%               | 3.2%           | 2.7%                    | 1.4%                             | 1.1%                                          | 11.8%                                     | 59.0%             |
| Chlorpyrifos   | 1.2%               | 3.3%           | 5.4%                    | 1.5%                             | 2.9%                                          | 18.6%                                     | 35.7%             |
| Diazinon       | 2.0%               | 4.8%           | 6.0%                    | 1.7%                             | 2.5%                                          | 9.6%                                      | 9.9%              |
| Acephate       | 1.4%               | 3.5%           | 5.5%                    | 1.0%                             | 1.1%                                          | 4.4%                                      | 2.6%              |
| Malathion      | 1.8%               | 5.6%           | 9.3%                    | 1.4%                             | 2.3%                                          | 9.3%                                      | 4.3%              |
| Permethrin     | 1.5%               | 4.8%           | 7.6%                    | 1.6%                             | 2.6%                                          | 11.9%                                     | 12.1%             |
| Bifenthrin     | 1.4%               | 4.3%           | 9.6%                    | 1.2%                             | 2.5%                                          | 10.4%                                     | 4.7%              |
| Methyl bromide | 1.8%               | 5.5%           | 7.5%                    | 1.5%                             | 2.1%                                          | 8.7%                                      | 7.1%              |
| Imidacloprid   | 1.6%               | 4.8%           | 9.3%                    | 1.3%                             | 3.2%                                          | 17.8%                                     | 17.1%             |
| Avermectin     | 1.1%               | 3.3%           | 8.2%                    | 1.0%                             | 4.3%                                          | 25.2%                                     | 19.1%             |
| Myclobutanil   | 1.7%               | 5.1%           | 8.0%                    | 1.4%                             | 3.2%                                          | 18.7%                                     | 17.8%             |

eTable 5. Odds ratios (95% CIs) for ASD *without* ID comorbidity and exposure to pesticides for pregnancy and first year of life exposures in logistic regression models

| Pesticide      | Pregnancy       |              |                 |              | First year of life |              |                 |              |
|----------------|-----------------|--------------|-----------------|--------------|--------------------|--------------|-----------------|--------------|
|                | OR <sup>1</sup> | 95% CI       | OR <sup>2</sup> | 95% CI       | OR <sup>1</sup>    | 95% CI       | OR <sup>2</sup> | 95% CI       |
| Glyphosates    | 1.13            | (1.03, 1.25) | 1.11            | (0.98, 1.27) | 1.10               | (1.00, 1.22) | 1.14            | (1.00, 1.30) |
| Chlorpyrifos   | 1.11            | (1.02, 1.21) | 1.07            | (0.95, 1.20) | 1.07               | (0.98, 1.17) | 1.04            | (0.92, 1.17) |
| Diazinon       | 1.05            | (0.96, 1.16) | 1.06            | (0.95, 1.18) | 0.96               | (0.87, 1.06) | 0.93            | (0.84, 1.05) |
| Acephate       | 1.06            | (0.93, 1.21) | 1.03            | (0.90, 1.18) | 0.96               | (0.85, 1.09) | 0.93            | (0.82, 1.06) |
| Malathion      | 1.11            | (1.00, 1.22) | 1.07            | (0.96, 1.20) | 1.09               | (0.99, 1.19) | 1.08            | (0.97, 1.20) |
| Permethrin     | 1.04            | (0.95, 1.14) | 0.98            | (0.89, 1.09) | 1.04               | (0.96, 1.14) | 1.01            | (0.92, 1.12) |
| Bifenthrin     | 1.01            | (0.92, 1.12) | 0.96            | (0.86, 1.07) | 1.06               | (0.96, 1.16) | 1.03            | (0.93, 1.14) |
| Methyl bromide | 0.98            | (0.88, 1.08) | 0.91            | (0.82, 1.02) | 1.04               | (0.95, 1.15) | 1.03            | (0.92, 1.15) |
| Imidacloprid   | 0.93            | (0.85, 1.01) | 0.83            | (0.75, 0.92) | 0.94               | (0.86, 1.02) | 0.88            | (0.79, 0.98) |
| Avermectin     | 1.14            | (1.05, 1.24) | 1.16            | (1.04, 1.30) | 1.06               | (0.98, 1.16) | 1.06            | (0.94, 1.19) |
| Myclobutanil   | 0.99            | (0.91, 1.08) | 0.96            | (0.87, 1.06) | 0.97               | (0.89, 1.05) | 0.94            | (0.84, 1.04) |

<sup>1</sup> Logistic regression; adjusted for year of birth, sex, maternal race/ethnicity, maternal age, maternal education, NOx (CALINE4); pesticide exposure defined as “ever vs. never” to specific substance in considered developmental period.

<sup>2</sup> Logistic regression; adjusted for all in model #1; pesticide exposure defined as “ever vs. never” to specific substance in considered developmental period with all considered pesticides in the model.



eTable 6a. Odds ratios (95% CIs) for all ASD and exposure to pesticides for pregnancy and first year of life exposures in 2,500m radius

| Pesticide      | Pregnancy       |              |                 |              | First year of life |              |                 |              |
|----------------|-----------------|--------------|-----------------|--------------|--------------------|--------------|-----------------|--------------|
|                | OR <sup>1</sup> | 95% CI       | OR <sup>2</sup> | 95% CI       | OR <sup>1</sup>    | 95% CI       | OR <sup>2</sup> | 95% CI       |
| Glyphosates    | 1.21            | (1.10, 1.34) | 1.20            | (1.05, 1.38) | 1.17               | (1.07, 1.29) | 1.21            | (1.06, 1.39) |
| Chlorpyrifos   | 1.12            | (1.03, 1.22) | 0.98            | (0.88, 1.10) | 1.11               | (1.02, 1.21) | 1.02            | (0.90, 1.15) |
| Diazinon       | 1.14            | (1.05, 1.24) | 1.12            | (1.01, 1.23) | 1.10               | (1.01, 1.19) | 1.06            | (0.96, 1.17) |
| Acephate       | 1.12            | (1.01, 1.25) | 1.08            | (0.97, 1.21) | 0.99               | (0.90, 1.10) | 0.95            | (0.86, 1.06) |
| Malathion      | 1.13            | (1.04, 1.23) | 1.08            | (0.98, 1.18) | 1.11               | (1.02, 1.20) | 1.06            | (0.97, 1.16) |
| Permethrin     | 1.10            | (1.02, 1.19) | 1.03            | (0.94, 1.12) | 1.11               | (1.03, 1.20) | 1.07            | (0.97, 1.17) |
| Bifenthrin     | 1.07            | (0.98, 1.17) | 1.01            | (0.92, 1.11) | 1.10               | (1.02, 1.19) | 1.06            | (0.97, 1.17) |
| Methyl bromide | 1.05            | (0.97, 1.15) | 0.97            | (0.88, 1.07) | 1.13               | (1.04, 1.23) | 1.09            | (0.99, 1.20) |
| Imidacloprid   | 0.94            | (0.87, 1.02) | 0.81            | (0.74, 0.89) | 0.95               | (0.88, 1.03) | 0.85            | (0.77, 0.94) |
| Avermectin     | 1.14            | (1.05, 1.23) | 1.10            | (0.99, 1.22) | 1.06               | (0.97, 1.15) | 0.96            | (0.86, 1.08) |
| Myclobutanil   | 1.05            | (0.98, 1.14) | 0.99            | (0.90, 1.09) | 1.01               | (0.94, 1.09) | 0.93            | (0.84, 1.03) |

<sup>1</sup> Logistic regression; adjusted for year of birth, sex, maternal race/ethnicity, maternal age, maternal education, NOx (derived from CALINE4); pesticide exposure defined as “ever vs. never” to specific substance in considered developmental period.

<sup>2</sup> Logistic regression; adjusted for all in model #1; pesticide exposure defined as “ever vs. never” to specific substance in considered developmental period with all considered pesticides in the model.

eTable 6b. Odds ratios (95% CIs) for ASD with ID comorbidity\_and exposure to pesticides for pregnancy and first year of life exposures in in 2,500m radius

| Pesticide      | Pregnancy       |              |                 |              | First year of life |              |                 |              |
|----------------|-----------------|--------------|-----------------|--------------|--------------------|--------------|-----------------|--------------|
|                | OR <sup>1</sup> | 95% CI       | OR <sup>2</sup> | 95% CI       | OR <sup>1</sup>    | 95% CI       | OR <sup>2</sup> | 95% CI       |
| Glyphosates    | 1.46            | (1.12, 1.89) | 1.22            | (0.86, 1.73) | 1.57               | (1.20, 2.05) | 1.36            | (0.94, 1.95) |
| Chlorpyrifos   | 1.39            | (1.12, 1.72) | 1.13            | (0.84, 1.52) | 1.39               | (1.11, 1.74) | 1.06            | (0.77, 1.46) |
| Diazinon       | 1.38            | (1.13, 1.69) | 1.23            | (0.97, 1.56) | 1.43               | (1.17, 1.74) | 1.26            | (0.99, 1.60) |
| Acephate       | 1.26            | (0.98, 1.61) | 1.14            | (0.88, 1.47) | 1.22               | (0.96, 1.54) | 1.07            | (0.84, 1.38) |
| Malathion      | 1.23            | (1.00, 1.51) | 1.04            | (0.83, 1.30) | 1.26               | (1.03, 1.53) | 1.05            | (0.84, 1.31) |
| Permethrin     | 1.52            | (1.25, 1.84) | 1.40            | (1.12, 1.75) | 1.49               | (1.23, 1.80) | 1.31            | (1.04, 1.64) |
| Bifenthrin     | 1.23            | (1.00, 1.53) | 1.12            | (0.89, 1.41) | 1.44               | (1.18, 1.76) | 1.34            | (1.07, 1.68) |
| Methyl bromide | 1.31            | (1.07, 1.61) | 1.11            | (0.88, 1.40) | 1.31               | (1.07, 1.60) | 1.09            | (0.86, 1.37) |
| Imidacloprid   | 0.92            | (0.76, 1.12) | 0.72            | (0.58, 0.90) | 1.07               | (0.88, 1.30) | 0.84            | (0.67, 1.07) |
| Avermectin     | 1.13            | (0.93, 1.38) | 0.87            | (0.68, 1.12) | 1.08               | (0.88, 1.32) | 0.69            | (0.53, 0.90) |
| Myclobutanil   | 1.20            | (0.99, 1.45) | 0.98            | (0.77, 1.25) | 1.31               | (1.07, 1.59) | 1.04            | (0.81, 1.34) |

<sup>1</sup> Logistic regression; adjusted for year of birth, sex, maternal race/ethnicity, maternal age, maternal education, NOx (CALINE4); pesticide exposure defined as “ever vs. never” to specific substance in considered developmental period.

<sup>2</sup> Logistic regression; adjusted for all in model #1; pesticide exposure defined as “ever vs. never” to specific substance in considered developmental period with all considered pesticides in the model.

eTable 7. Odds ratios (95% CIs) for ASD (all) and exposure to pesticides for pregnancy and first year of life exposures in logistic regression models stratified by males/females

| Pesticide      | Pregnancy       |              |                 |              | First year of life |              |                 |              |
|----------------|-----------------|--------------|-----------------|--------------|--------------------|--------------|-----------------|--------------|
|                | OR <sup>1</sup> | 95% CI       | OR <sup>2</sup> | 95% CI       | OR <sup>1</sup>    | 95% CI       | OR <sup>2</sup> | 95% CI       |
|                | Males           |              |                 |              |                    |              |                 |              |
| Glyphosates    | 1.14            | (1.03, 1.26) | 1.11            | (0.97, 1.27) | 1.12               | (1.01, 1.23) | 1.15            | (1.00, 1.31) |
| Chlorpyrifos   | 1.12            | (1.03, 1.22) | 1.07            | (0.95, 1.21) | 1.07               | (0.98, 1.17) | 1.02            | (0.90, 1.16) |
| Diazinon       | 1.10            | (1.00, 1.22) | 1.09            | (0.98, 1.23) | 1.00               | (0.91, 1.11) | 0.96            | (0.86, 1.08) |
| Acephate       | 1.12            | (0.98, 1.28) | 1.10            | (0.96, 1.26) | 1.02               | (0.90, 1.16) | 0.99            | (0.87, 1.13) |
| Malathion      | 1.10            | (0.99, 1.22) | 1.04            | (0.93, 1.16) | 1.12               | (1.02, 1.23) | 1.10            | (0.99, 1.22) |
| Permethrin     | 1.12            | (1.02, 1.23) | 1.07            | (0.97, 1.19) | 1.10               | (1.00, 1.20) | 1.08            | (0.97, 1.20) |
| Bifenthrin     | 1.00            | (0.90, 1.11) | 0.94            | (0.84, 1.05) | 1.04               | (0.94, 1.14) | 0.99            | (0.89, 1.10) |
| Methyl bromide | 1.02            | (0.92, 1.13) | 0.94            | (0.84, 1.05) | 1.08               | (0.98, 1.20) | 1.06            | (0.95, 1.19) |
| Imidacloprid   | 0.92            | (0.84, 1.00) | 0.81            | (0.73, 0.90) | 0.92               | (0.85, 1.01) | 0.85            | (0.76, 0.95) |
| Avermectin     | 1.11            | (1.01, 1.21) | 1.09            | (0.97, 1.21) | 1.04               | (0.95, 1.13) | 0.99            | (0.88, 1.12) |
| Myclobutanil   | 1.02            | (0.94, 1.11) | 0.98            | (0.88, 1.09) | 0.99               | (0.91, 1.08) | 0.97            | (0.87, 1.08) |
|                | Females         |              |                 |              |                    |              |                 |              |
| Glyphosates    | 1.27            | (1.02, 1.58) | 1.19            | (0.90, 1.59) | 1.34               | (1.08, 1.66) | 1.27            | (0.95, 1.71) |
| Chlorpyrifos   | 1.20            | (1.00, 1.44) | 1.06            | (0.83, 1.37) | 1.26               | (1.04, 1.52) | 1.09            | (0.84, 1.42) |
| Diazinon       | 1.12            | (0.91, 1.38) | 1.04            | (0.82, 1.32) | 1.20               | (0.98, 1.47) | 1.16            | (0.92, 1.47) |
| Acephate       | 0.95            | (0.71, 1.28) | 0.87            | (0.64, 1.18) | 0.91               | (0.69, 1.20) | 0.81            | (0.60, 1.07) |
| Malathion      | 1.16            | (0.94, 1.44) | 1.10            | (0.87, 1.39) | 1.06               | (0.86, 1.30) | 0.96            | (0.77, 1.20) |
| Permethrin     | 1.04            | (0.85, 1.26) | 0.91            | (0.73, 1.13) | 1.10               | (0.92, 1.33) | 0.94            | (0.75, 1.16) |
| Bifenthrin     | 1.15            | (0.93, 1.42) | 1.08            | (0.86, 1.36) | 1.36               | (1.13, 1.65) | 1.33            | (1.07, 1.65) |
| Methyl bromide | 1.08            | (0.87, 1.35) | 0.98            | (0.77, 1.25) | 1.08               | (0.88, 1.33) | 0.97            | (0.77, 1.21) |
| Imidacloprid   | 0.96            | (0.80, 1.16) | 0.80            | (0.64, 1.00) | 1.05               | (0.88, 1.26) | 0.91            | (0.73, 1.14) |
| Avermectin     | 1.21            | (1.01, 1.46) | 1.19            | (0.94, 1.50) | 1.22               | (1.01, 1.47) | 1.07            | (0.83, 1.37) |
| Myclobutanil   | 1.11            | (0.93, 1.33) | 1.05            | (0.84, 1.31) | 1.06               | (0.89, 1.27) | 0.89            | (0.71, 1.12) |

<sup>1</sup> Logistic regression adjusted for year of birth, maternal race/ethnicity, maternal age, maternal education, NOx (CALINE4); pesticide exposure defined as “ever vs. never” to specific substance in considered developmental period.

<sup>2</sup> Logistic regression; adjusted for all in model #1; pesticide exposure defined as “ever vs. never” to specific substance in considered developmental period with all considered pesticides in the model.
